# Supplementary material for: Enhancing Xylanase Production from Aspergillus tamarii Kita and Its Application in the Bioconversion of Agro-Industrial Residues into Fermentable Sugars Using Factorial Design
Source: MDPI journal article supplement (doi:10.3390/fermentation10050241), 2024-04-30
Supplement: s1 [file s1]

## Supplementary material

# Enhancing Xylanase Production from *Aspergillus tamarii* Kita and Its Application in the Bioconversion of Agro-Industrial Residues into Fermentable Sugars Using Factorial Design

Jose Carlos Santos Salgado <sup>1,2</sup>, Paulo Ricardo Heinen <sup>3</sup>, Josana Maria Messias <sup>3</sup>, Lummy Maria Oliveira-Monteiro <sup>3</sup>, Mariana Cereia <sup>2</sup>, Carem Gledes Vargas Rechia <sup>4</sup>, Alexandre Maller <sup>5</sup>, Marina Kimiko Kadowaki <sup>5</sup>, Richard John Ward <sup>1,3</sup> and Maria de Lourdes Teixeira de Moraes Polizeli <sup>2,3,\*</sup>

<sup>1</sup> Department of Chemistry, Faculdade de Filosofia, Ciências e Letras de Ribeirão Preto (FFCLRP), University of São Paulo, 14040-900 Ribeirão Preto, São Paulo, Brazil; salgado@usp.br (J.C.S.S.); rjward@ffclrp.usp.br (R.J.W.)

<sup>2</sup> Department of Biology, Faculdade de Filosofia, Ciências e Letras de Ribeirão Preto (FFCLRP), University of São Paulo, 14040-901 Ribeirão Preto, São Paulo, Brazil; macereia@ffclrp.usp.br

<sup>3</sup> Department of Biochemistry and Immunology, Faculdade de Medicina de Ribeirão Preto (FMRP), University of São Paulo, 14049-900 Ribeirão Preto, São Paulo, Brazil; prheinen@alumni.usp.br (P.R.H.); josana.messias@gmail.com (J.M.M.); lummy@udel.edu (L.M.O.-M.)

<sup>4</sup> Department of Biomolecular Sciences, Faculdade de Ciências Farmacêuticas de Ribeirão Preto (FCFRP), University of São Paulo, 14040-903 Ribeirão Preto, São Paulo, Brazil; cvrechia@fcrp.usp.br

<sup>5</sup> Center of Medical Sciences and Pharmaceutical, Western Paraná State University, 85819-170 Cascavel, Paraná, Brazil; alexandre.maller@unioeste.br (A.M.); marina.kadowaki@unioeste.br (M.K.K.)

\* Correspondence: polizeli@ffclrp.usp.br

**Supplementary Table S1.** Glucan, xylan, and Klason lignin relative composition

| Residue                            | Glucan (%) |                            | Xylan (%) |                            | Klason lignin (%) |                            | Reference |
|------------------------------------|------------|----------------------------|-----------|----------------------------|-------------------|----------------------------|-----------|
|                                    | Content    | Removal after pretreatment | Content   | Removal after pretreatment | Content           | Removal after pretreatment |           |
| <i>In natura</i> sugarcane bagasse | 41.95      | -                          | 21.70     | -                          | 23.61             | -                          | [58]      |
| Steam-exploded sugarcane bagasse   | 63.12      | 11.16                      | 6.49      | 82.35                      | 23.07             | 42.31                      | [58]      |
| <i>In natura</i> Barley bagasse    | 27.50      | -                          | 28.8      | -                          | 12.8              | -                          | [59]      |

The residues were determined after the total removal of their components.

**Supplementary Table S2.** Enzyme activities present in the crude extract of *A. tamarii* Kita.

| Enzyme activity         | Enzymatic activity<br>(U mL <sup>-1</sup> ) | Specific activity<br>(U mg <sup>-1</sup> ) |
|-------------------------|---------------------------------------------|--------------------------------------------|
| Amylase                 | 6.500 ± 0.158                               | 73.034 ± 1.775                             |
| Endo-1,4-β-xylanase     | 23.122 ± 0.313                              | 259.360 ± 3.955                            |
| 1,4-β-xylosidase        | 0.025 ± 0.002                               | 0.281 ± 0.022                              |
| α-L-arabinofuranosidase | 0.243 ± 0.012                               | 2.730 ± 0.135                              |
| Endo-1,4-β-glucanase    | 0.150 ± 0.014                               | 1.685 ± 0.158                              |
| Cellobiohydrolase       | 0.255 ± 0.015                               | 2.865 ± 0.169                              |
| 1,4-β-glucosidase       | 0.040 ± 0.003                               | 0.449 ± 0.034                              |
| Pectinase               | 0.191 ± 0.017                               | 2.146 ± 0.191                              |
| Laccase                 | ND                                          | ND                                         |

ND: not detected.
